# Supplementary material for: Magnetostatic reciprocity for MR magnet design
Source: Copernicus journal article supplement (doi:10.5194/mr-2-607-2021), 2021-08-04
Supplement: Supplementary file 1 [file mr-2-607-2021-supplement.zip]

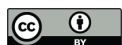

*Supplement of*

## **Magnetostatic reciprocity for MR magnet design**

**Pedro Freire Silva et al.**

*Correspondence to:* Jan G. Korvink ([jan.korvink@kit.edu](mailto:jan.korvink@kit.edu))

- [mr-2-607-2021-supplement-title-page.pdf](#)
- [1st experiment - discretehalbach.mph](#)
- [2nd experiment - powder magnet energy min - Kopie.mph](#)
- [3rd experiment - adjustable profiling cylinders.mph](#)
- [4th experiment - NV magnet.mph](#)

The copyright of individual parts of the supplement might differ from the article licence.
