# Supplementary material for: Magnetostatic reciprocity for MR magnet design
Source: Magn Reson (Gott). 2021 Aug 4;2(2):607–17. doi: 10.5194/mr-2-607-2021 (PMC10539805; doi:10.5194/mr-2-607-2021)
Supplement: The supplement related to this article is available online at: https://doi.org/10.5194/mr-2-607-2021-supplement. [file mr-2-607-supplement.zip]

Archive with 5 entries (5 files):
- 3rd experiment - adjustable profiling cylinders.mph
- 2nd experiment - powder magnet energy min - Kopie.mph
- mr-2-607-2021-supplement-title-page.pdf
- 4th experiment - NV magnet.mph
- 1st experiment - discretehalbach.mph
